# Supplementary material for: A fishhook probe-based rolling circle amplification (FP-RCA) assay for efficient isolation and detection of microRNA without total RNA extraction
Source: Royal Society of Chemistry journal article supplement (doi:10.1039/c8an01544a), 2018-01-01
Supplement: c8an01544a1.pdf [file c8an01544a1.pdf]

## **Supporting Information:**

### **Culture of the MCF-7 and L02 cell lines**

MCF-7 cell lines were purchased from the Chinese Academy of Sciences (Shanghai, China), culturing in Minimum Eagle's Medium (MEM). The culture media was supplemented with 10% fetal bovine serum (Sigma-Aldrich, USA), 100 units/mL penicillin and 100 µg/mL streptomycin (Thermo Fisher). L02 cell lines were from laboratory save, culturing in 1640 medium (Hangzhou Jinuo Bio-pharmaceutical Tech. Co., Ltd., China). The culture media were supplemented with 10% fetal bovine serum (Sigma-Aldrich, USA). All of the cells were grown in an atmosphere of 5% CO<sub>2</sub> at 37 °C.

### **Synthesis of the circular probe**

Circular probe was synthesized by ligation of the circle primer. 30 µL reaction solution containing 1 µM circle primer, 1 µM ligation primer, 1 × T4 DNA ligase buffer (66 mM Tris-HCl, 6.6 mM MgCl<sub>2</sub>, 10 mM DTT, 0.1 mM ATP, pH 7.6) and 10 U/ µL T4 DNA ligase (Takara) was incubated at 16 °C for 2 h. Then, the circle primers that were not ligated and ligation primers were digested at 37 °C for 1 h by adding 10U Exonuclease I (Takara) and 100U Exonuclease III (Takara). Finally, denature the enzyme at 80 °C for 20 min.

### **Gel electrophoresis analysis**

The 2% agarose gel electrophoresis was carried out in 0.5× Tris-acetate-EDTA (TAE) (Shanghai Sangon, China) at a constant voltage of 100 V for 30 min at room temperature. Nucleic acid dye Gene finder (Xiamen Zeesan Biotech. Co., Ltd., China) was added beforehand. Gels were photographed by gel image instrument (Xiamen Zeesan Biotech. Co., Ltd., China).

**RCA assay for miR-21 detection without *fishhook* probe based magnetic separation**

30  $\mu$ L amplification reaction solution containing 1 $\times$  Phi 29 polymerase buffer (50 mM Tris-HCl, 10 mM MgCl<sub>2</sub>, 10 mM (NH<sub>4</sub>)<sub>2</sub>SO<sub>4</sub>, 4 mM DTT, pH 7.5), 200  $\mu$ M dNTP, 0.2 U/ $\mu$ L Phi 29 polymerase, 10 nM circular probe and different concentrations of miR-21 was incubated at 31 °C for 2 h. Then, 1.5  $\mu$ L 20 $\times$ Evagreen Dye and 1.5  $\mu$ L EDTA (0.5 M, pH 8.0) was added and the fluorescence was recorded by the smartphone based imaging device.

Table S1. Sequences of nucleic acids used in the experiment

| primer                   | sequence                                                                                                                |
|--------------------------|-------------------------------------------------------------------------------------------------------------------------|
| 3-biotin-immobilization  | 5-                                                                                                                      |
| probe                    | CAACCACACTGGCAAGAGGC AAAAAAAAAAAA<br>AAAA-biotin                                                                        |
| Circle primer for miR-21 | 5-p-<br>GTGGTTGTCTTCT <b><u>TCAACATCAGTCTGATAAG</u></b><br><b><u>CTAATAACATTATACGCCATCCTCAGCCAGCCT</u></b><br>CTTGCCAGT |
| Ligation primer          | AGAAGACAACCACACTGGCAAGAGGC                                                                                              |
| miR-21                   | 5- UAGCUUAUCAGACUGAUGUUGA                                                                                               |
| Let-7a                   | 5- UGAGGUAGUAGGUUGUAUAGUU                                                                                               |
| miR-141                  | 5- UAA CAC UGU CUG GUA AAG AUG G                                                                                        |
| miR-155                  | 5- UUA AUG CUA AUC GUG AUA GGG GU                                                                                       |
| M1                       | 5- UAGCUUAUCAUACUGAUGUUGA                                                                                               |
| M3                       | 5- UAGCUGAUCAUACUGACGUUGA                                                                                               |
| M5                       | 5- UAUCUGAUCAUACUGACGUUAA                                                                                               |

Table S2. Comparison of present assay with reported methods for miRNA detection

| Method                                                                     | Real sample    | Total RNA extraction | Detection technique      | Instrumentation                   | Performance  | References                                   |
|----------------------------------------------------------------------------|----------------|----------------------|--------------------------|-----------------------------------|--------------|----------------------------------------------|
| CHA, RCA and ALP labeled signal amplification                              | Cultured cells | YES                  | Electrochemistry         | Electrochemical workstation       | 0.5-12500 pM | <i>Analyst</i> , 2018, 143, 2304             |
| Isothermal exponential amplification reaction (EXPAR)                      | Cultured cells | YES                  | Electrochemistry         | Electrochemical workstation       | 20 fM-50 pM  | <i>Anal. Chem.</i> 2014, 86, 8200            |
| SDA, DNAzyme catalysis reaction and magnetic separation                    | Human serum    | YES                  | Fluorescence             | Fluorescence spectrophotometer    | 1 fM-50 pM   | <i>Biosens. Bioelectron.</i> , 2017, 96, 106 |
| DNAzyme-assisted target recycling, RCA and HRP-mimicking DNAzyme catalysis | Cultured cells | YES                  | Electrochemiluminescence | Electrochemiluminescence analyzer | 1 fM-100 pM  | <i>Anal. Chem.</i> 2015, 87, 3202            |
| rGO based magnetic solid-phase extraction and RCA                          | Human plasma   | YES                  | Fluorescence             | RT cycler                         | 100 aM-1 pM  | <i>Anal. Chem.</i> 2017, 89, 10137           |
| Magnetic separation and RCA                                                | Cultured cells | NO                   | Fluorescence             | Smartphone                        | 100 fM-1 nM  | Present work                                 |

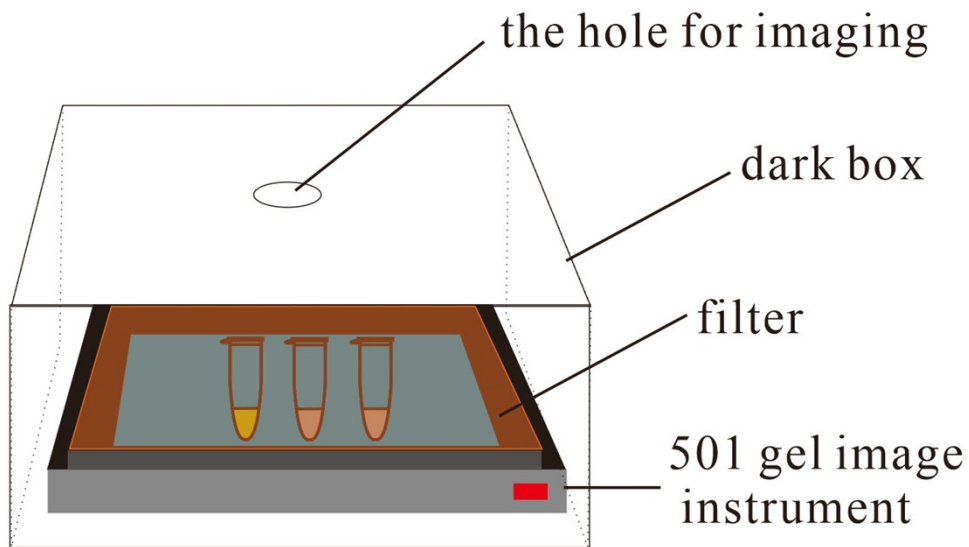

Figure S1. Smartphone based imaging device

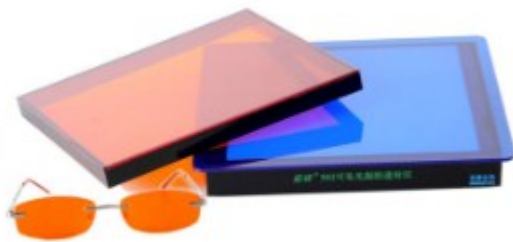

Figure S2. 501 Visible light gel image instrument

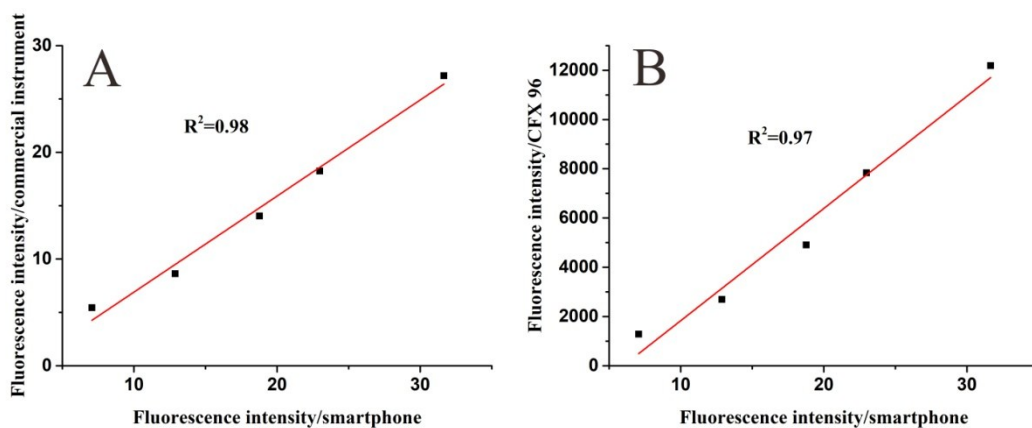

Figure S3. Comparison of the fluorescence intensity analysis based on smartphone and commercial 621 visible light gel image instrument (A); fluorescence quantitative analysis based on smartphone and CFX96 Touch real-time PCR detection system (25

°C, detection interval of 1 min) (B); concentration of fluorescein sodium is 50, 100, 200, 300, 500 nM in 10 mM sodium borate.

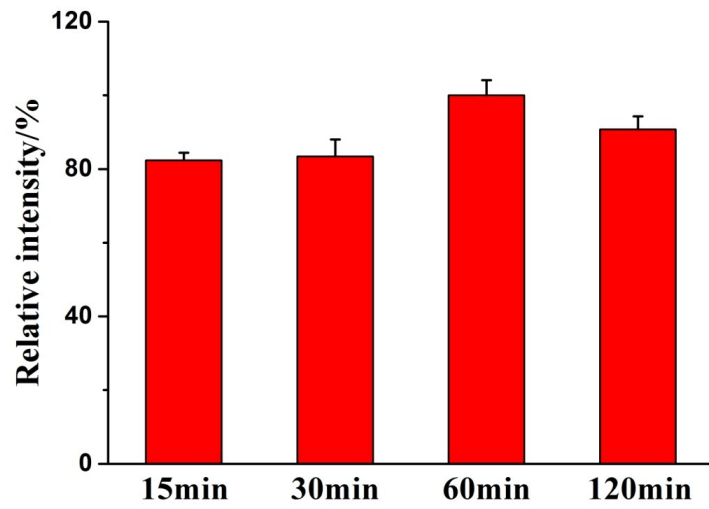

Figure S4. The influence of the hybridization time for miR-21 detection.

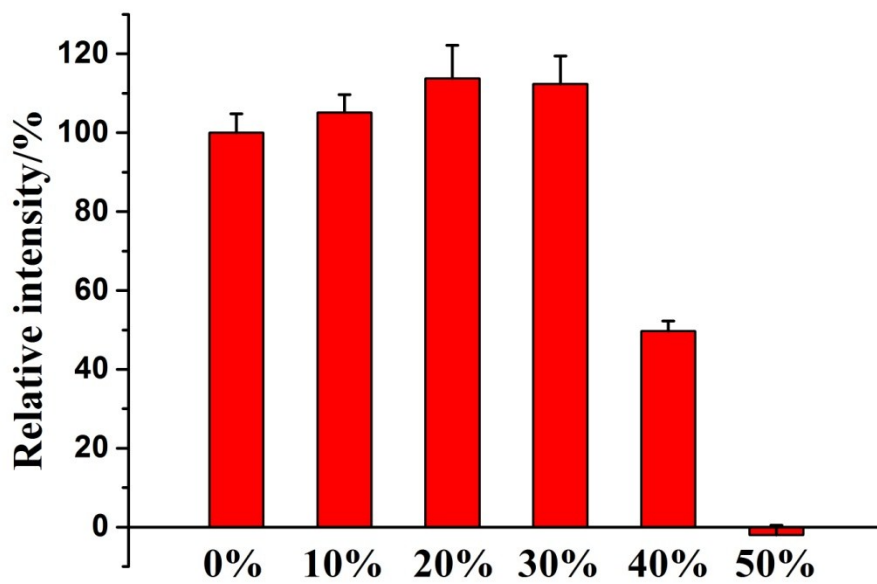

Figure S5. The influence of the formamide concentration for miR-21 detection when washing after hybridization process (formamide concentration refers to the volume fraction in 1× PBS).

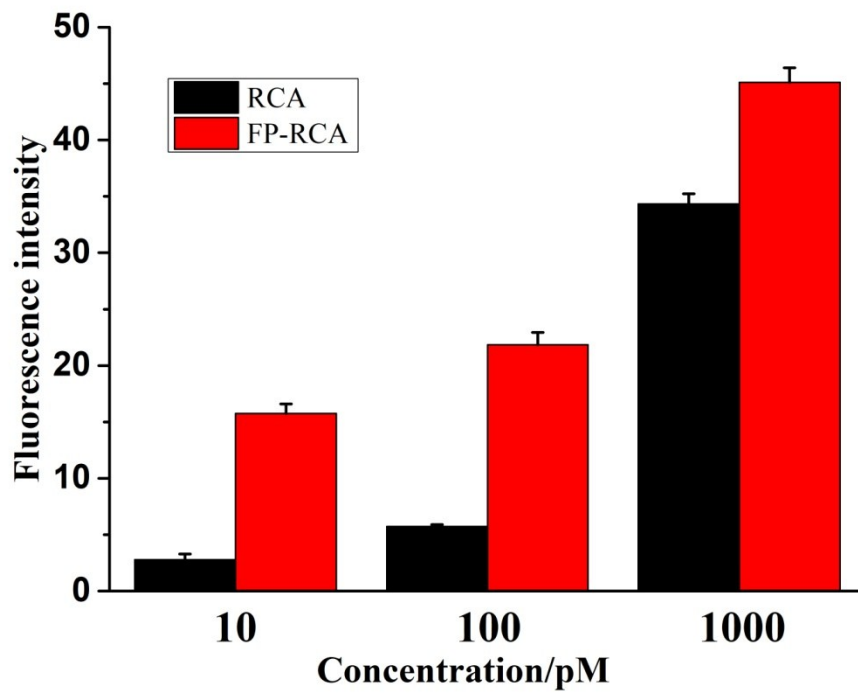

Figure S6. The fluorescence intensity in the presence of different concentrations miR-21 with RCA and FP-RCA assay.
